# Supplementary material for: Down-regulation of Sox7 is associated with aberrant activation of Wnt/β-catenin signaling in endometrial cancer
Source: PubMed Central journal article supplement (PMC3681493; doi:10.18632/oncotarget.667), 2012-11-07
Supplement: oncotarget-03-1546-s001.pdf [file oncotarget-03-1546-s001.pdf]

## Down-regulation of Sox7 is associated with aberrant activation of Wnt/ $\beta$ -catenin signaling in endometrial cancer - Chan et al

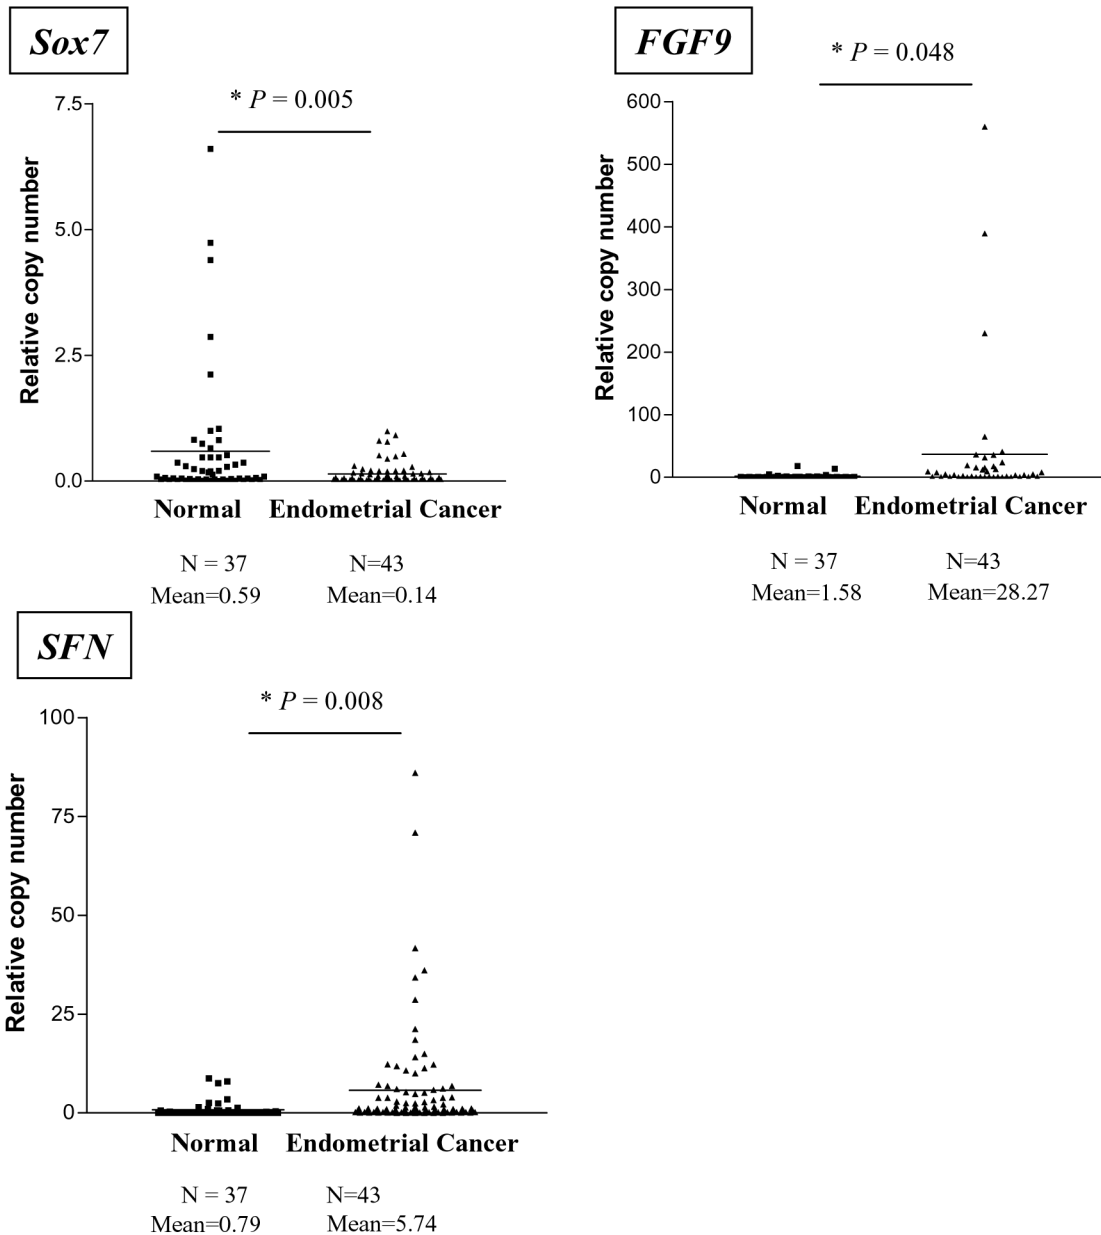

**Supplementary Figure 1.** Quantitative RT-PCR analysis showed that *Sox7* was significantly underexpressed in endometrial cancer ( $P = 0.005$ ). Besides, the underexpressed was inversely correlated with two Wnt/ $\beta$ -catenin signaling targets; *FGF9* ( $P = 0.0048$ ) and *SFN* ( $P = 0.008$ )
